# Supplementary material
Source: PubMed Central journal article supplement (PMC9310669)

**A**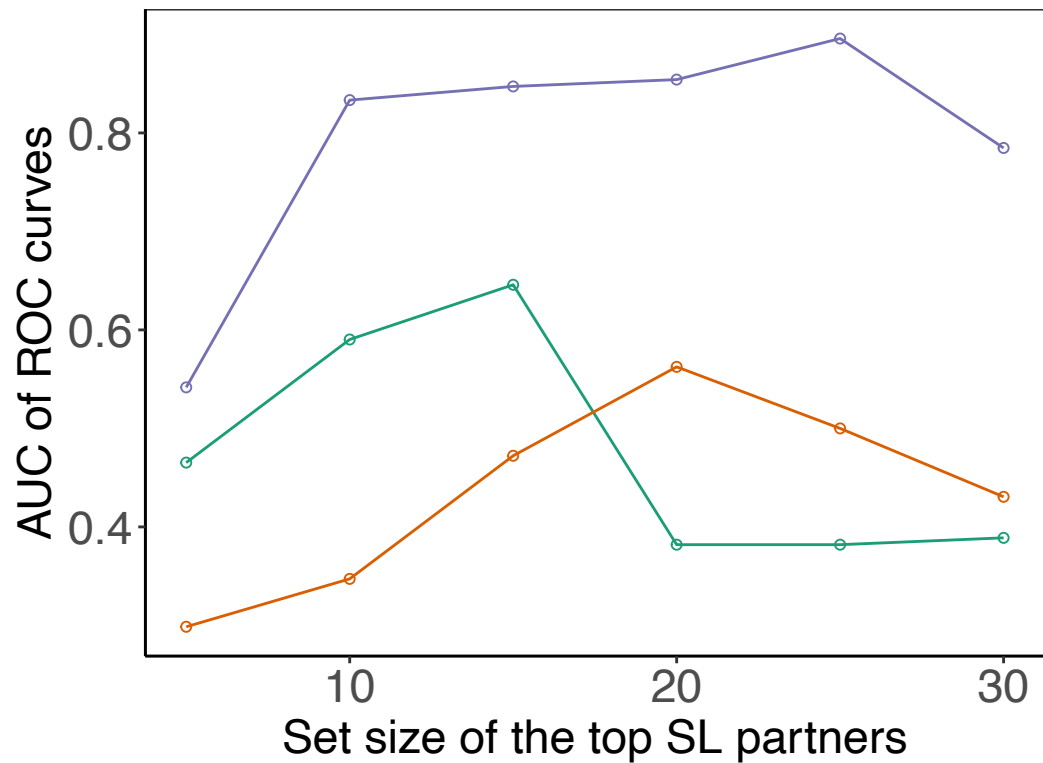**B**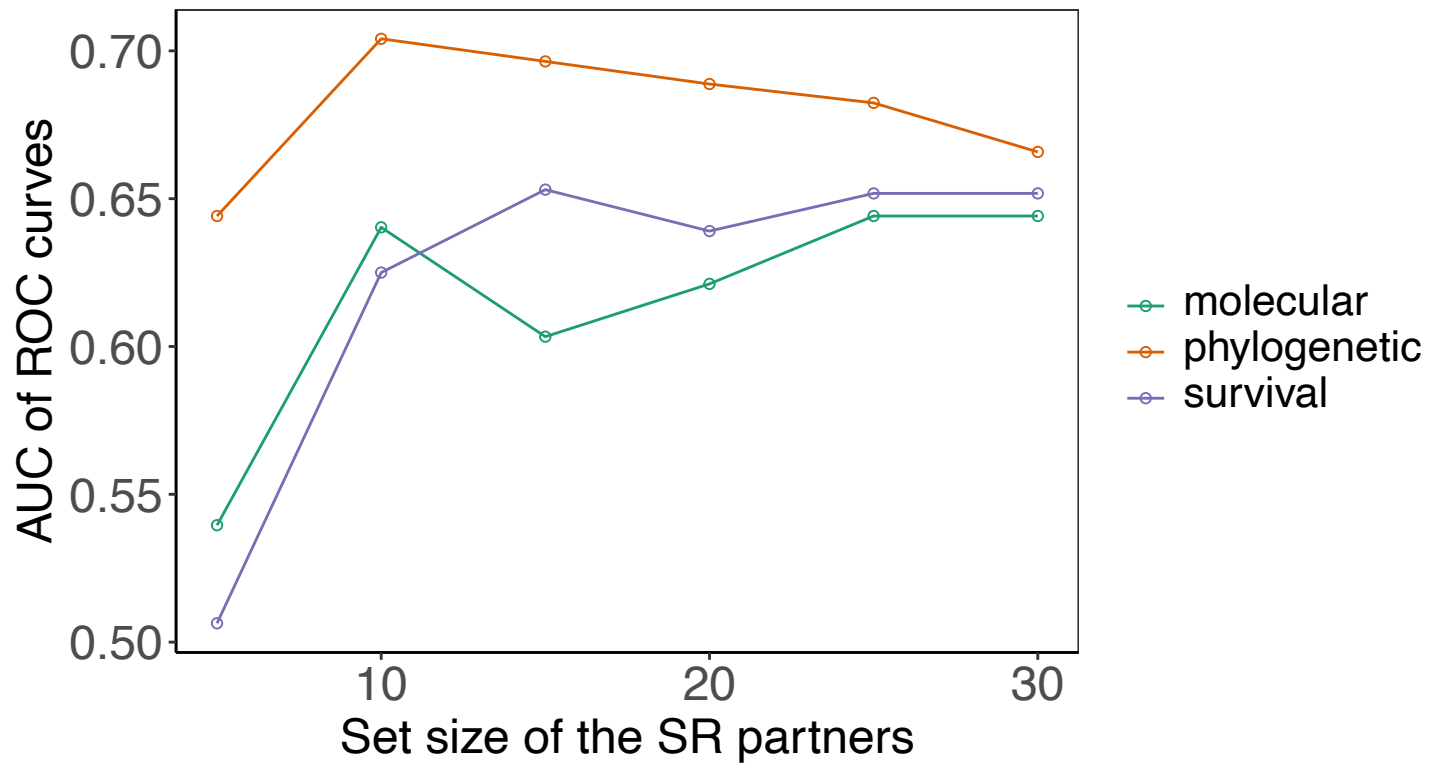

Supplement: NIHMS1683518-supplement-1.pdf [file NIHMS1683518-supplement-1.pdf]

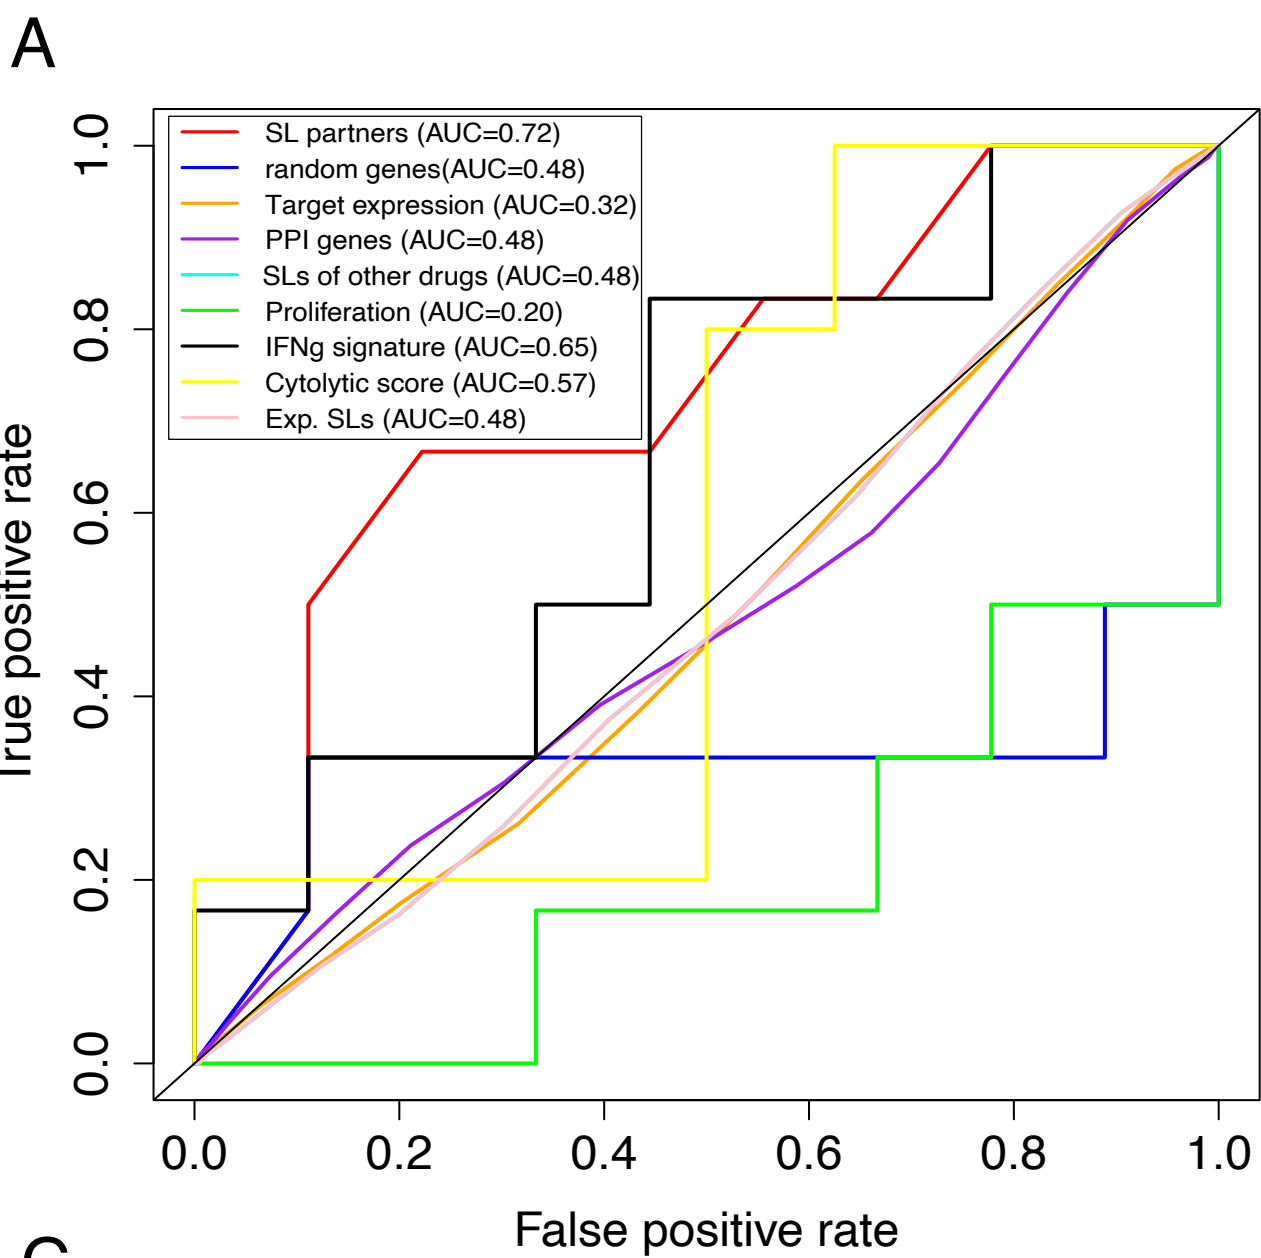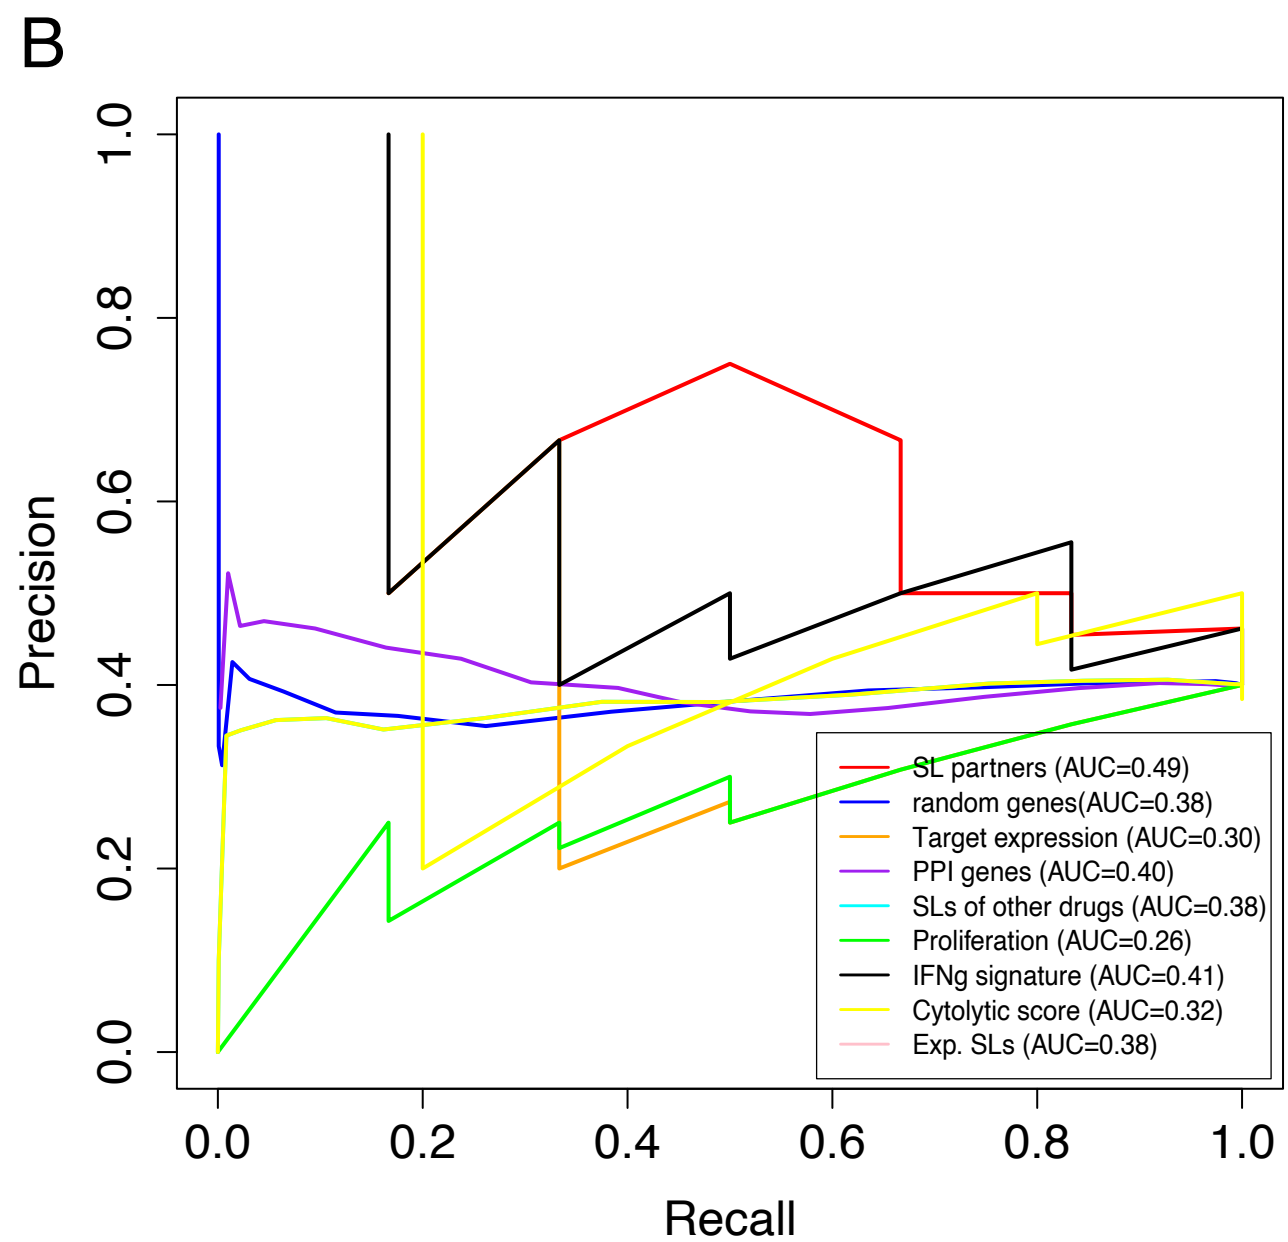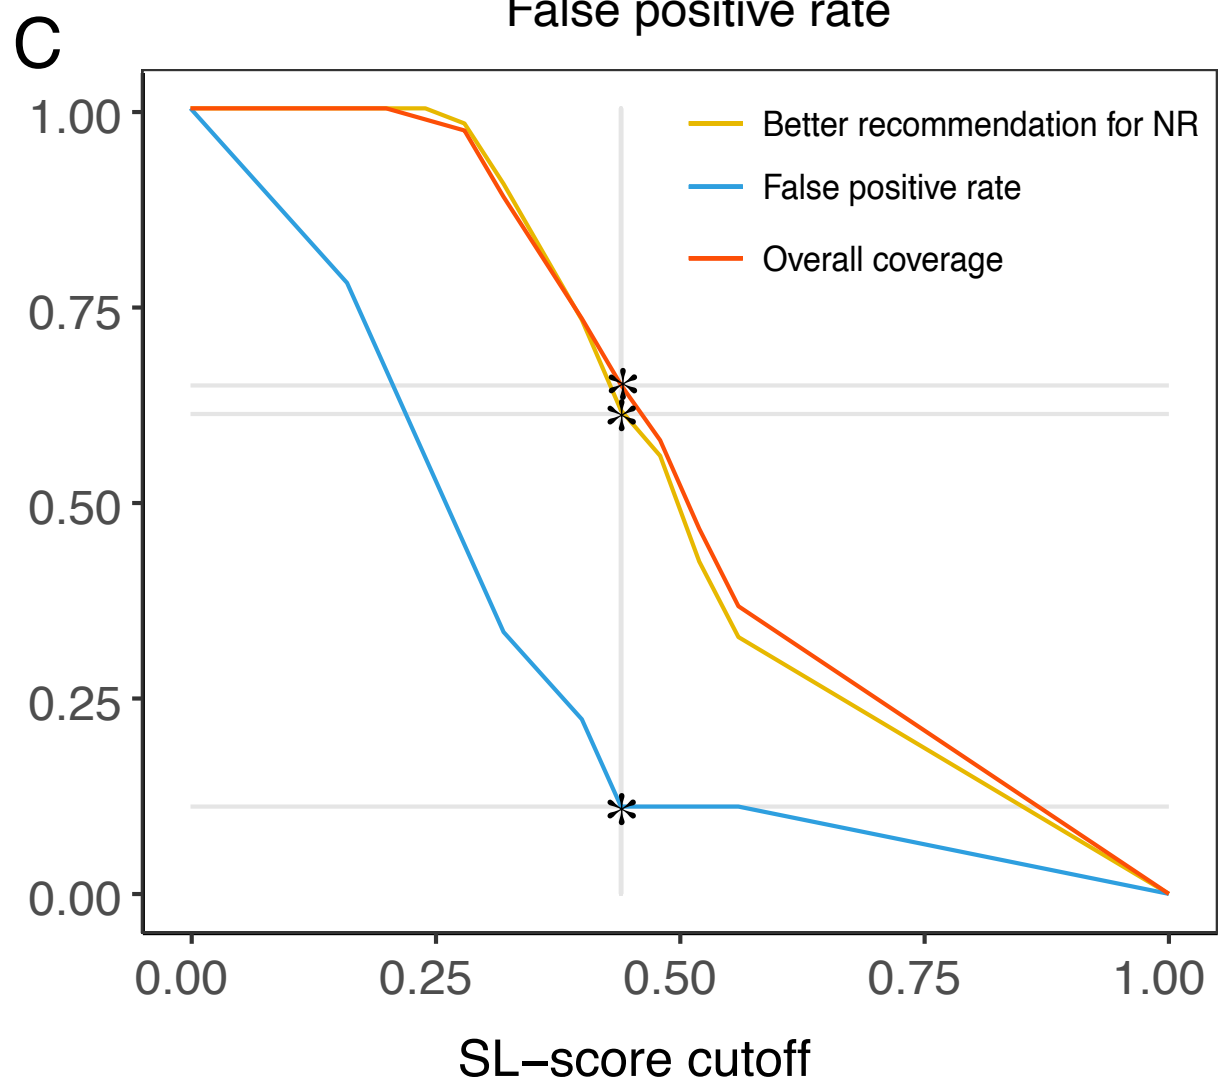

Supplement: NIHMS1683518-supplement-4.pdf [file NIHMS1683518-supplement-4.pdf]
